# Supplementary material for: Amplification of heat extremes by plant CO2 physiological forcing
Source: PubMed Central journal article supplement (PMC5854667; doi:10.1038/s41467-018-03472-w), 2018-03-15
Supplement: 41467_2018_3472_MOESM1_ESM.pdf [file 41467_2018_3472_MOESM1_ESM.pdf]

Supplementary Information for  
**Amplification of heat extremes by plant CO<sub>2</sub> physiological forcing**

Skinner et al.

# Observed and CMIP5 Mean Summer Leaf Area Index

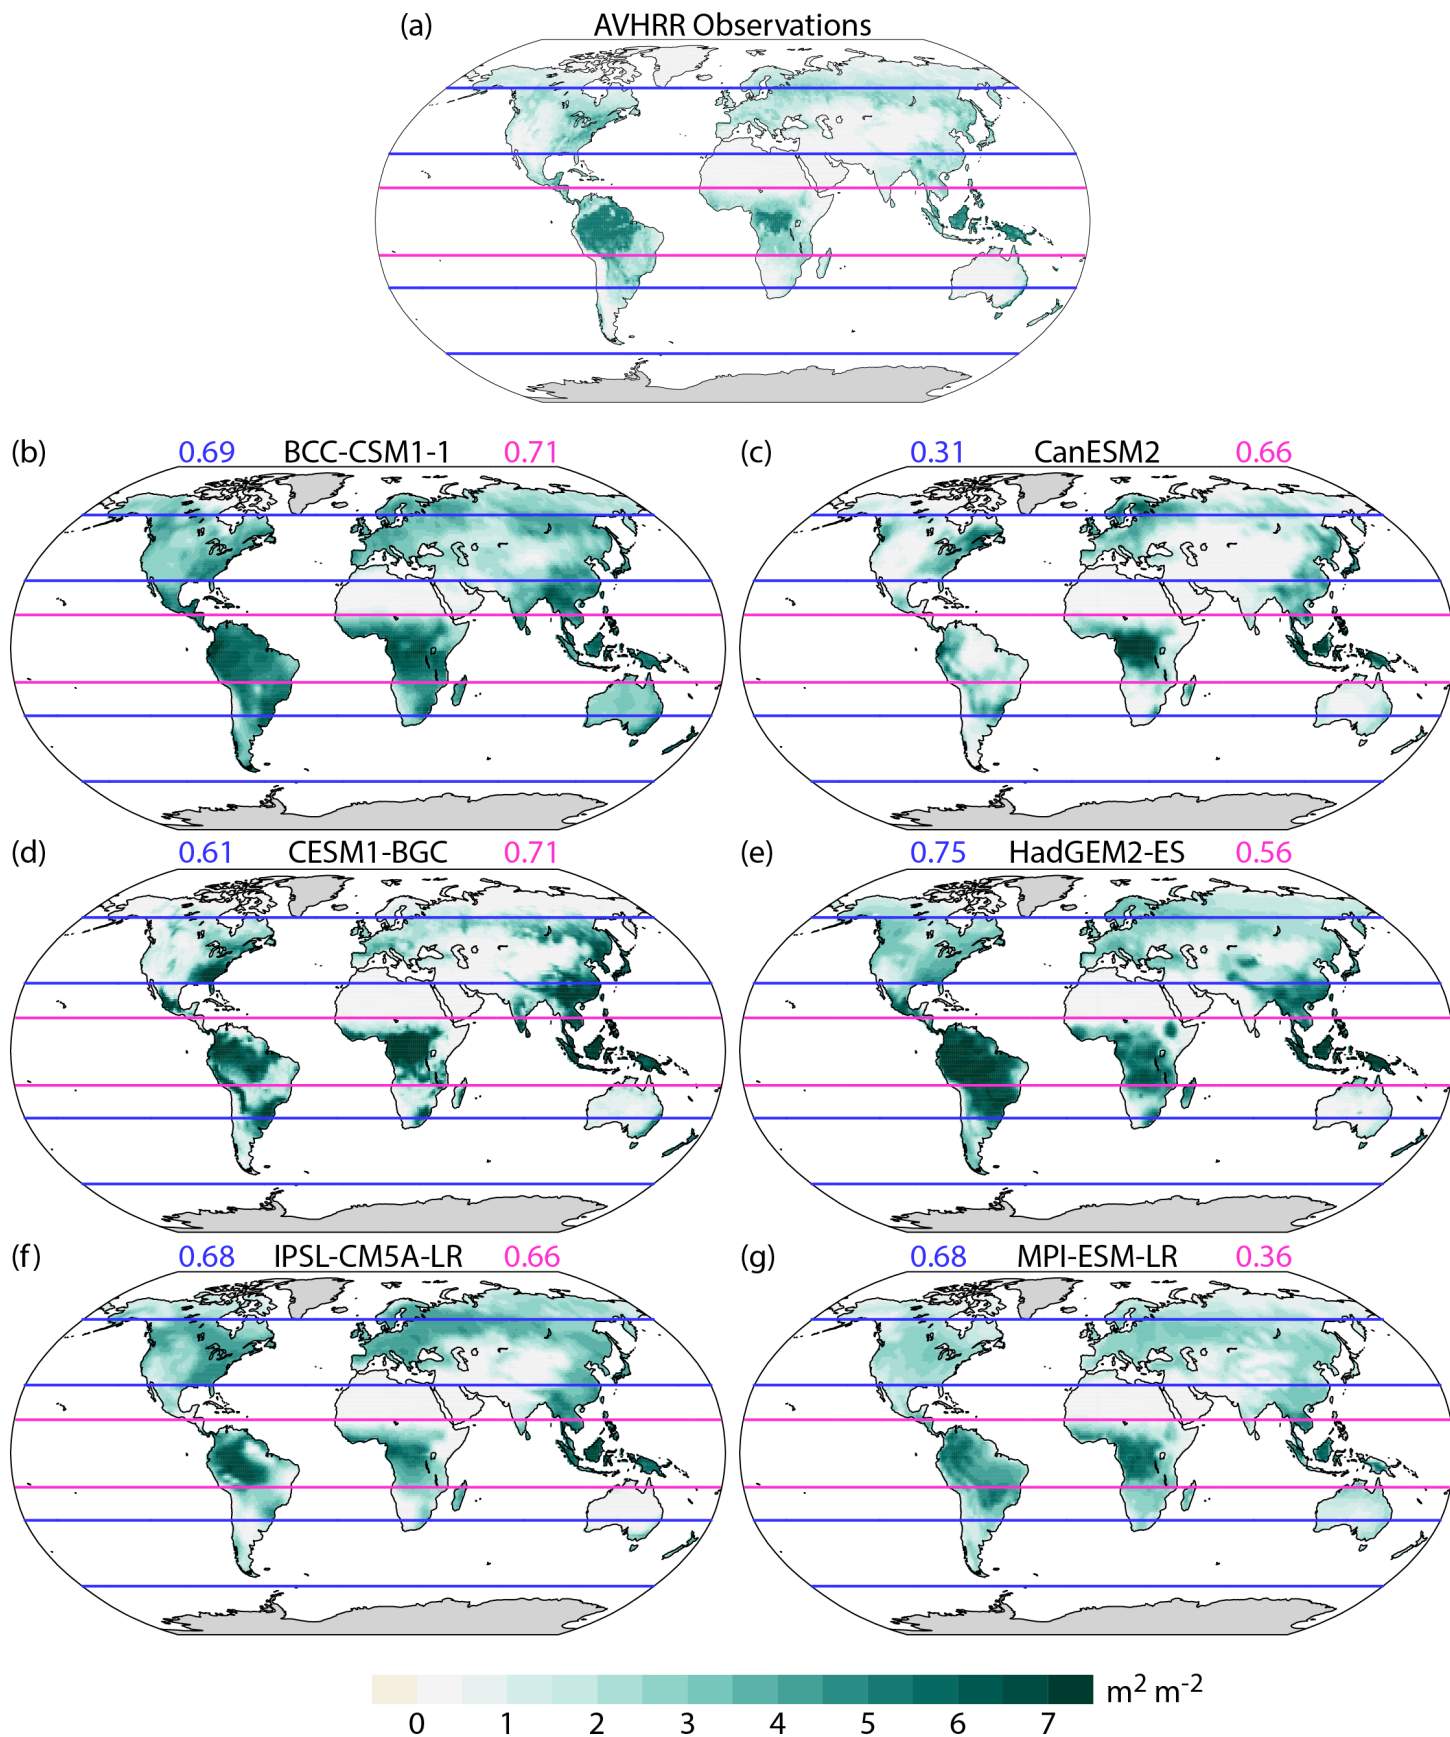

Supplementary Figure 1. Comparison of CMIP5 and satellite-based leaf area index (LAI). Mean summer LAI from (a) the AVH15C1 satellite-derived observation dataset (years 1990 - 2010), and (b-g) the *TotalCO2* simulations from CMIP5 (years 22-32, CO<sub>2</sub> values of ~ 355 - 390 ppm). Model years 22 - 32 are chosen to closely match the CO<sub>2</sub> values during the years 1990 - 2010. Centered pattern correlation values between AVH15C1 and model data for the tropics (15°S - 15°N, pink) and mid-latitudes (30°N/S - 60°N/S, blue) are listed above each panel. JJAS (DJFM) values are used in the Northern (Southern) Hemisphere.

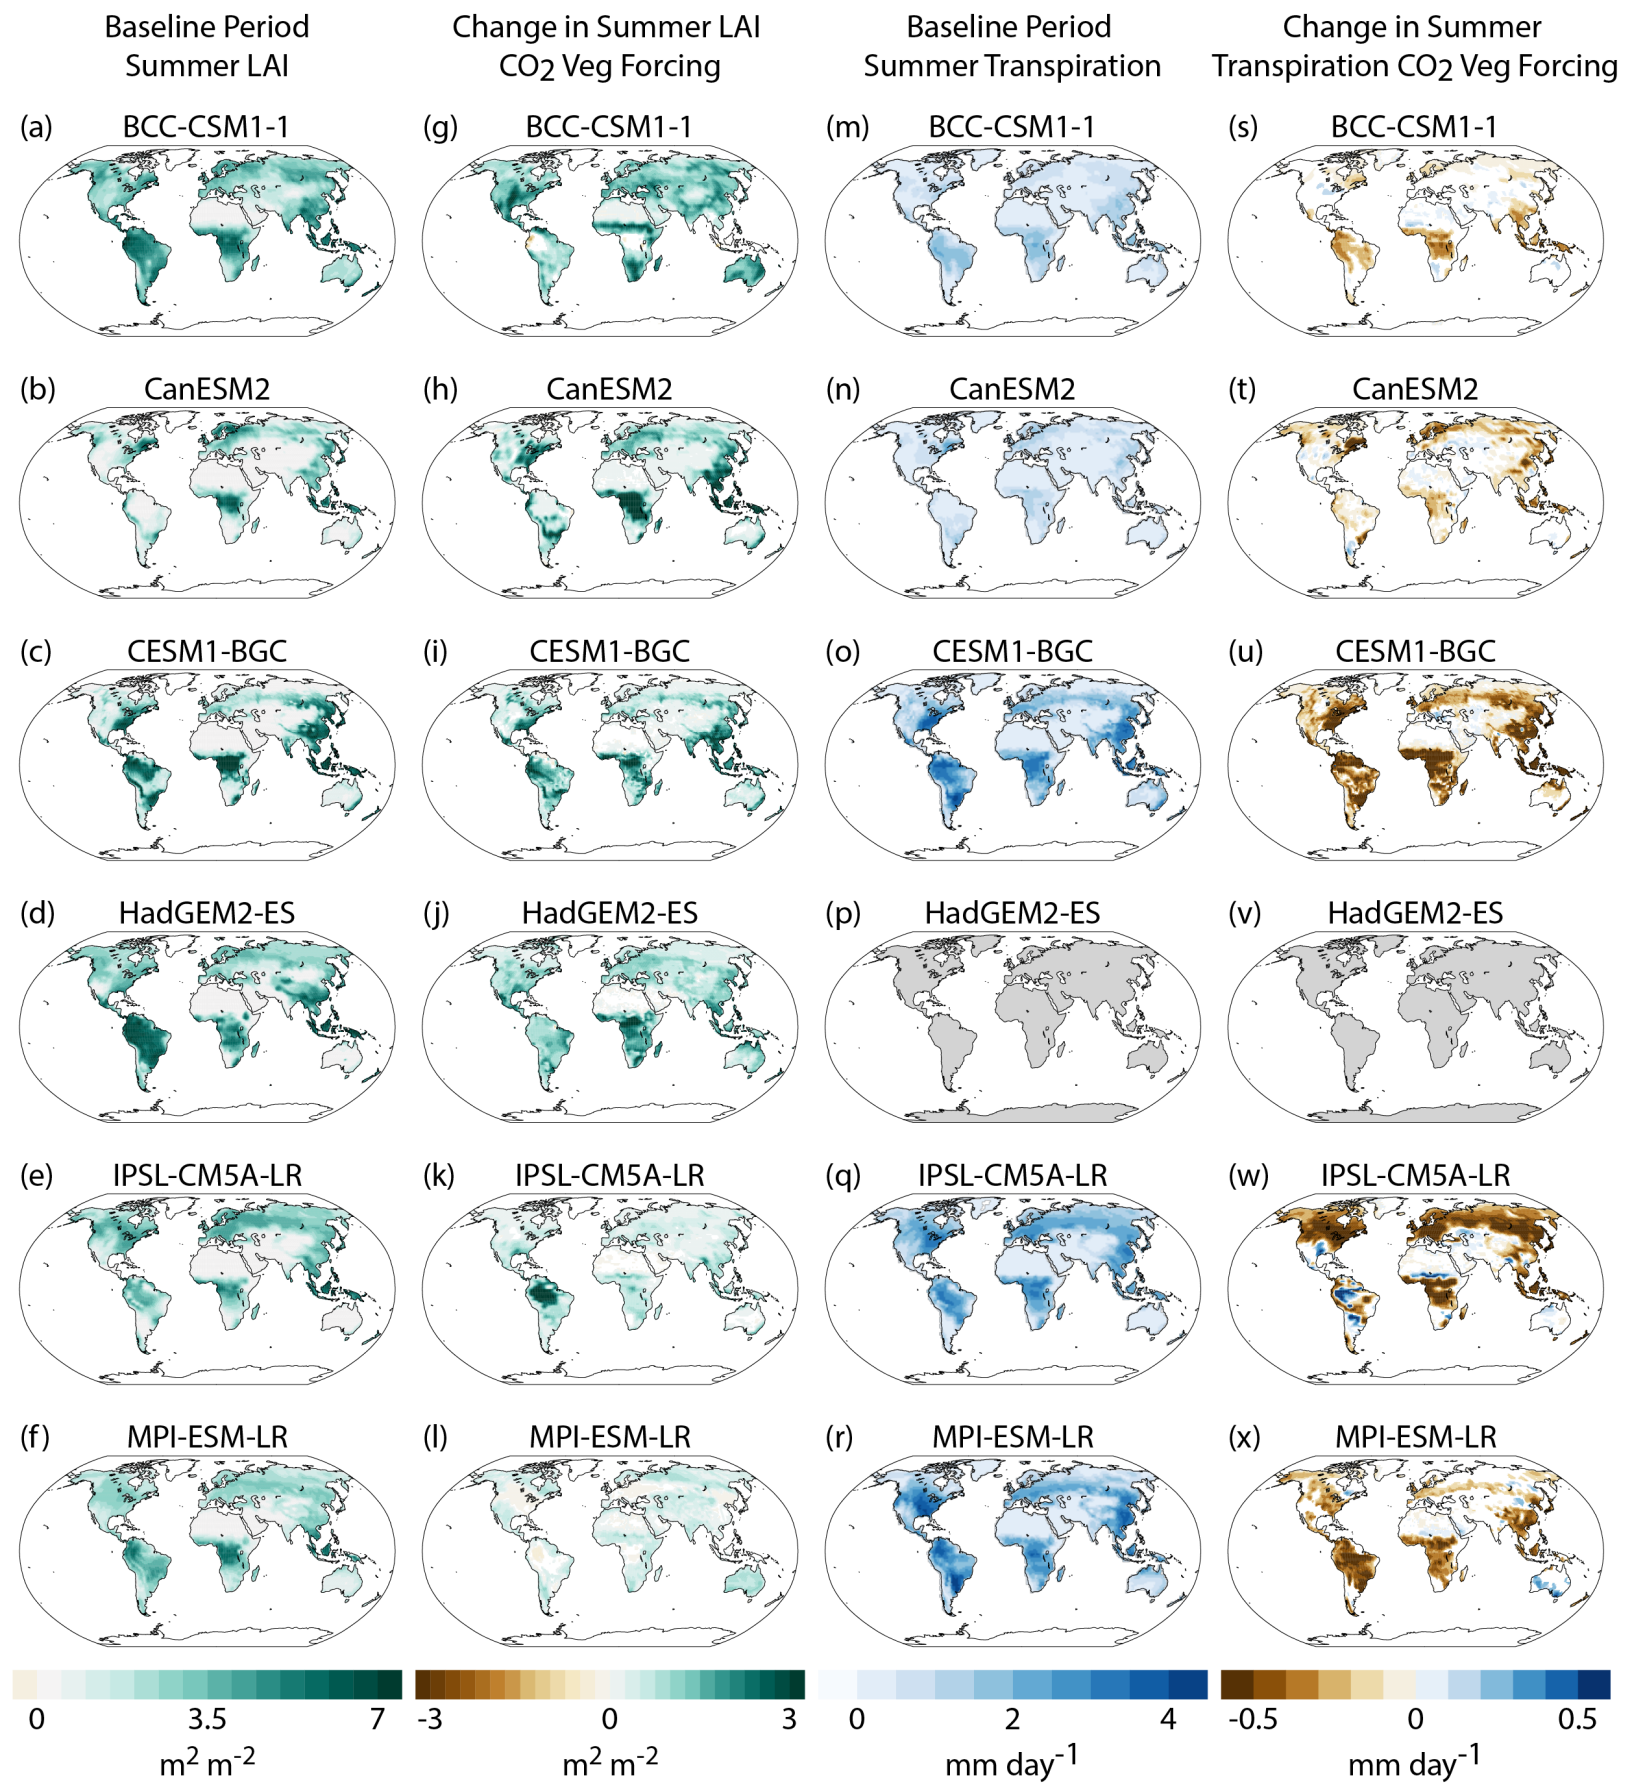

Supplementary Figure 2. Simulated baseline period and statistically significant change in LAI and transpiration. Mean summer (a-f) reference climate LAI (final 30 years of the *RadCO2* simulation), (g-l) change in LAI from CO<sub>2</sub> vegetation forcing, (m-r) reference climate transpiration, and (s-x) change in transpiration from CO<sub>2</sub> vegetation forcing. JJAS (DJFM) values are used in the Northern (Southern) Hemisphere. HadGEM2-ES does not output a transpiration variable.

Percent Change in Summer LAI and Sign of Transpiration Change from CO<sub>2</sub> Veg Forcing

Percent Change in Summer WUE and Sign of Transpiration Change from CO<sub>2</sub> Veg Forcing

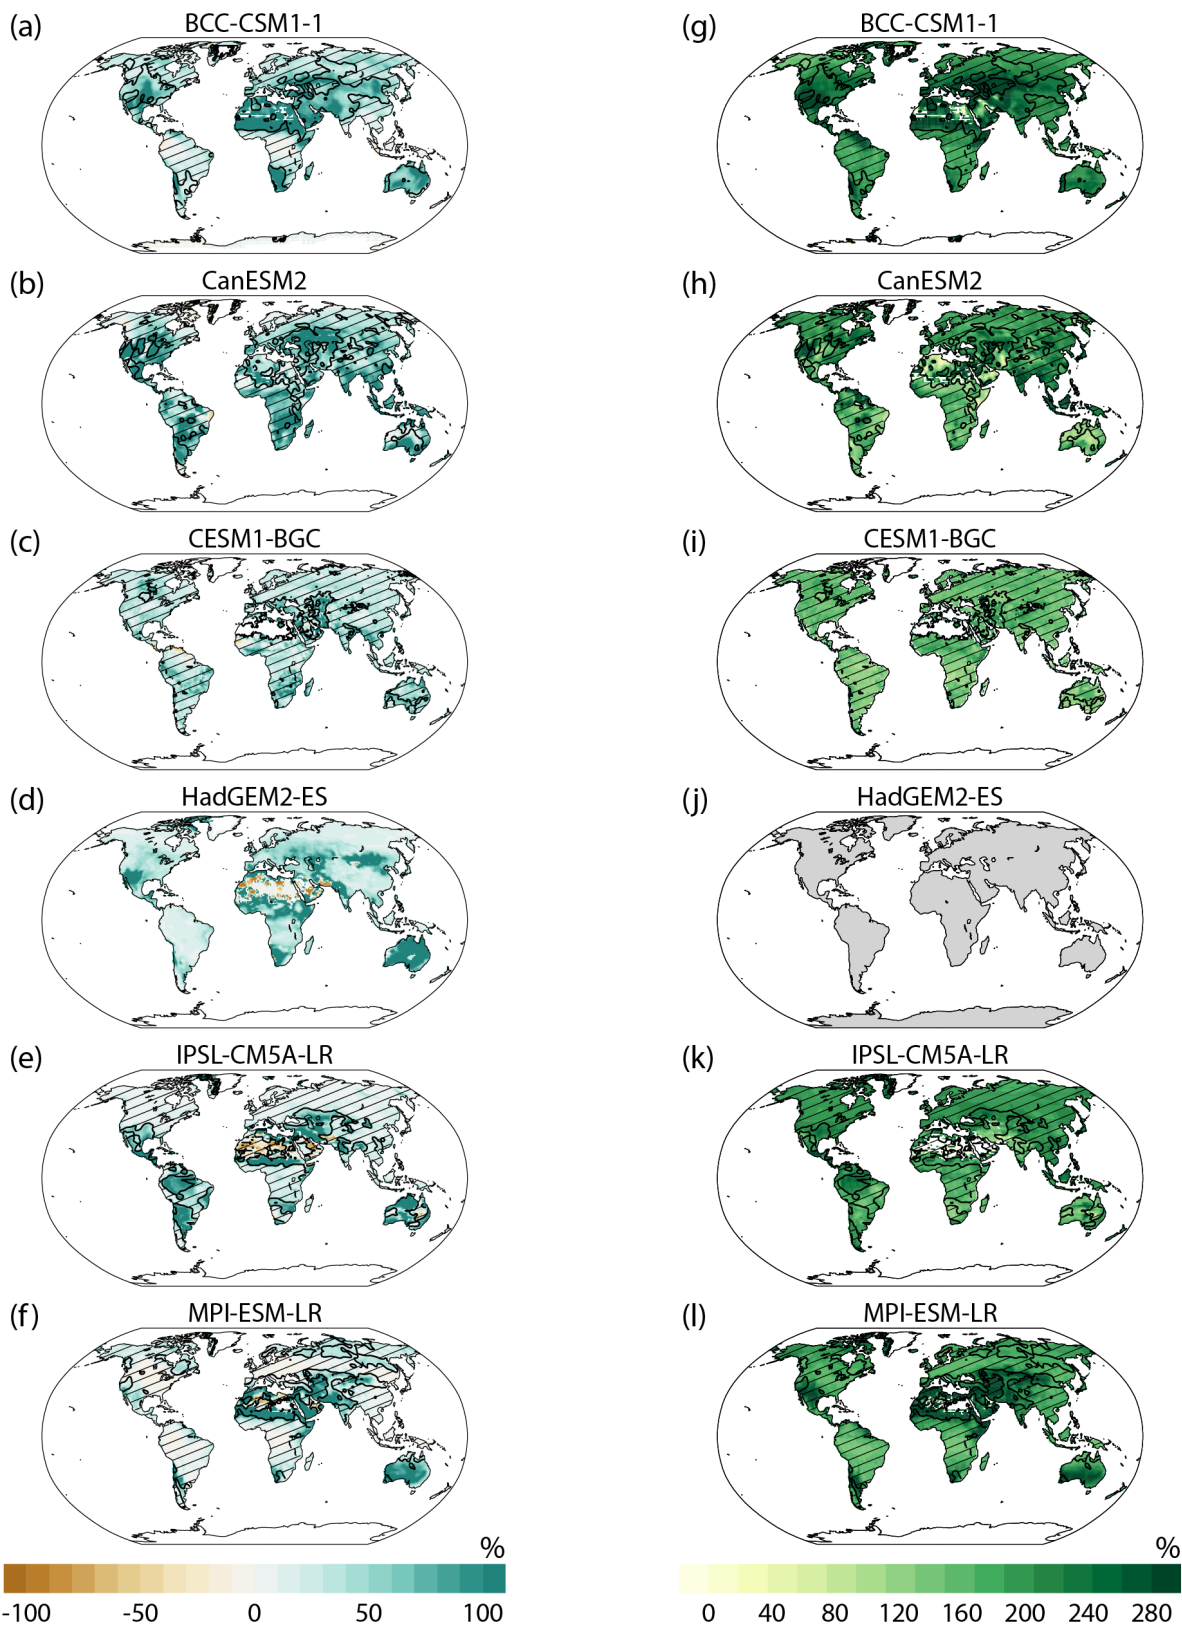

Supplementary Figure 3. Percent change in LAI and WUE from CO<sub>2</sub> vegetation forcing. Percent change in mean summer (a-f) LAI and (g-l) WUE from CO<sub>2</sub> vegetation forcing (shading). Dashed lines indicate where the sign of mean summer transpiration change from CO<sub>2</sub> vegetation forcing is negative. The maximum and minimum percent LAI changes are capped at +100% and -100%, respectively, in (a-f). JJAS (DJFM) values are used in the Northern (Southern) Hemisphere in all panels. HadGEM2-ES does not output transpiration and therefore is not used to analyze WUE (defined here as the ratio of gross primary productivity to transpiration).

Change in Summer  
Evapotranspiration  
CO<sub>2</sub> Veg Forcing

Change in Summer  
Evaporative Fraction  
CO<sub>2</sub> Veg Forcing

Change in Summer  
Cloud Fraction  
CO<sub>2</sub> Veg Forcing

Change in Summer  
Precipitation  
CO<sub>2</sub> Veg Forcing

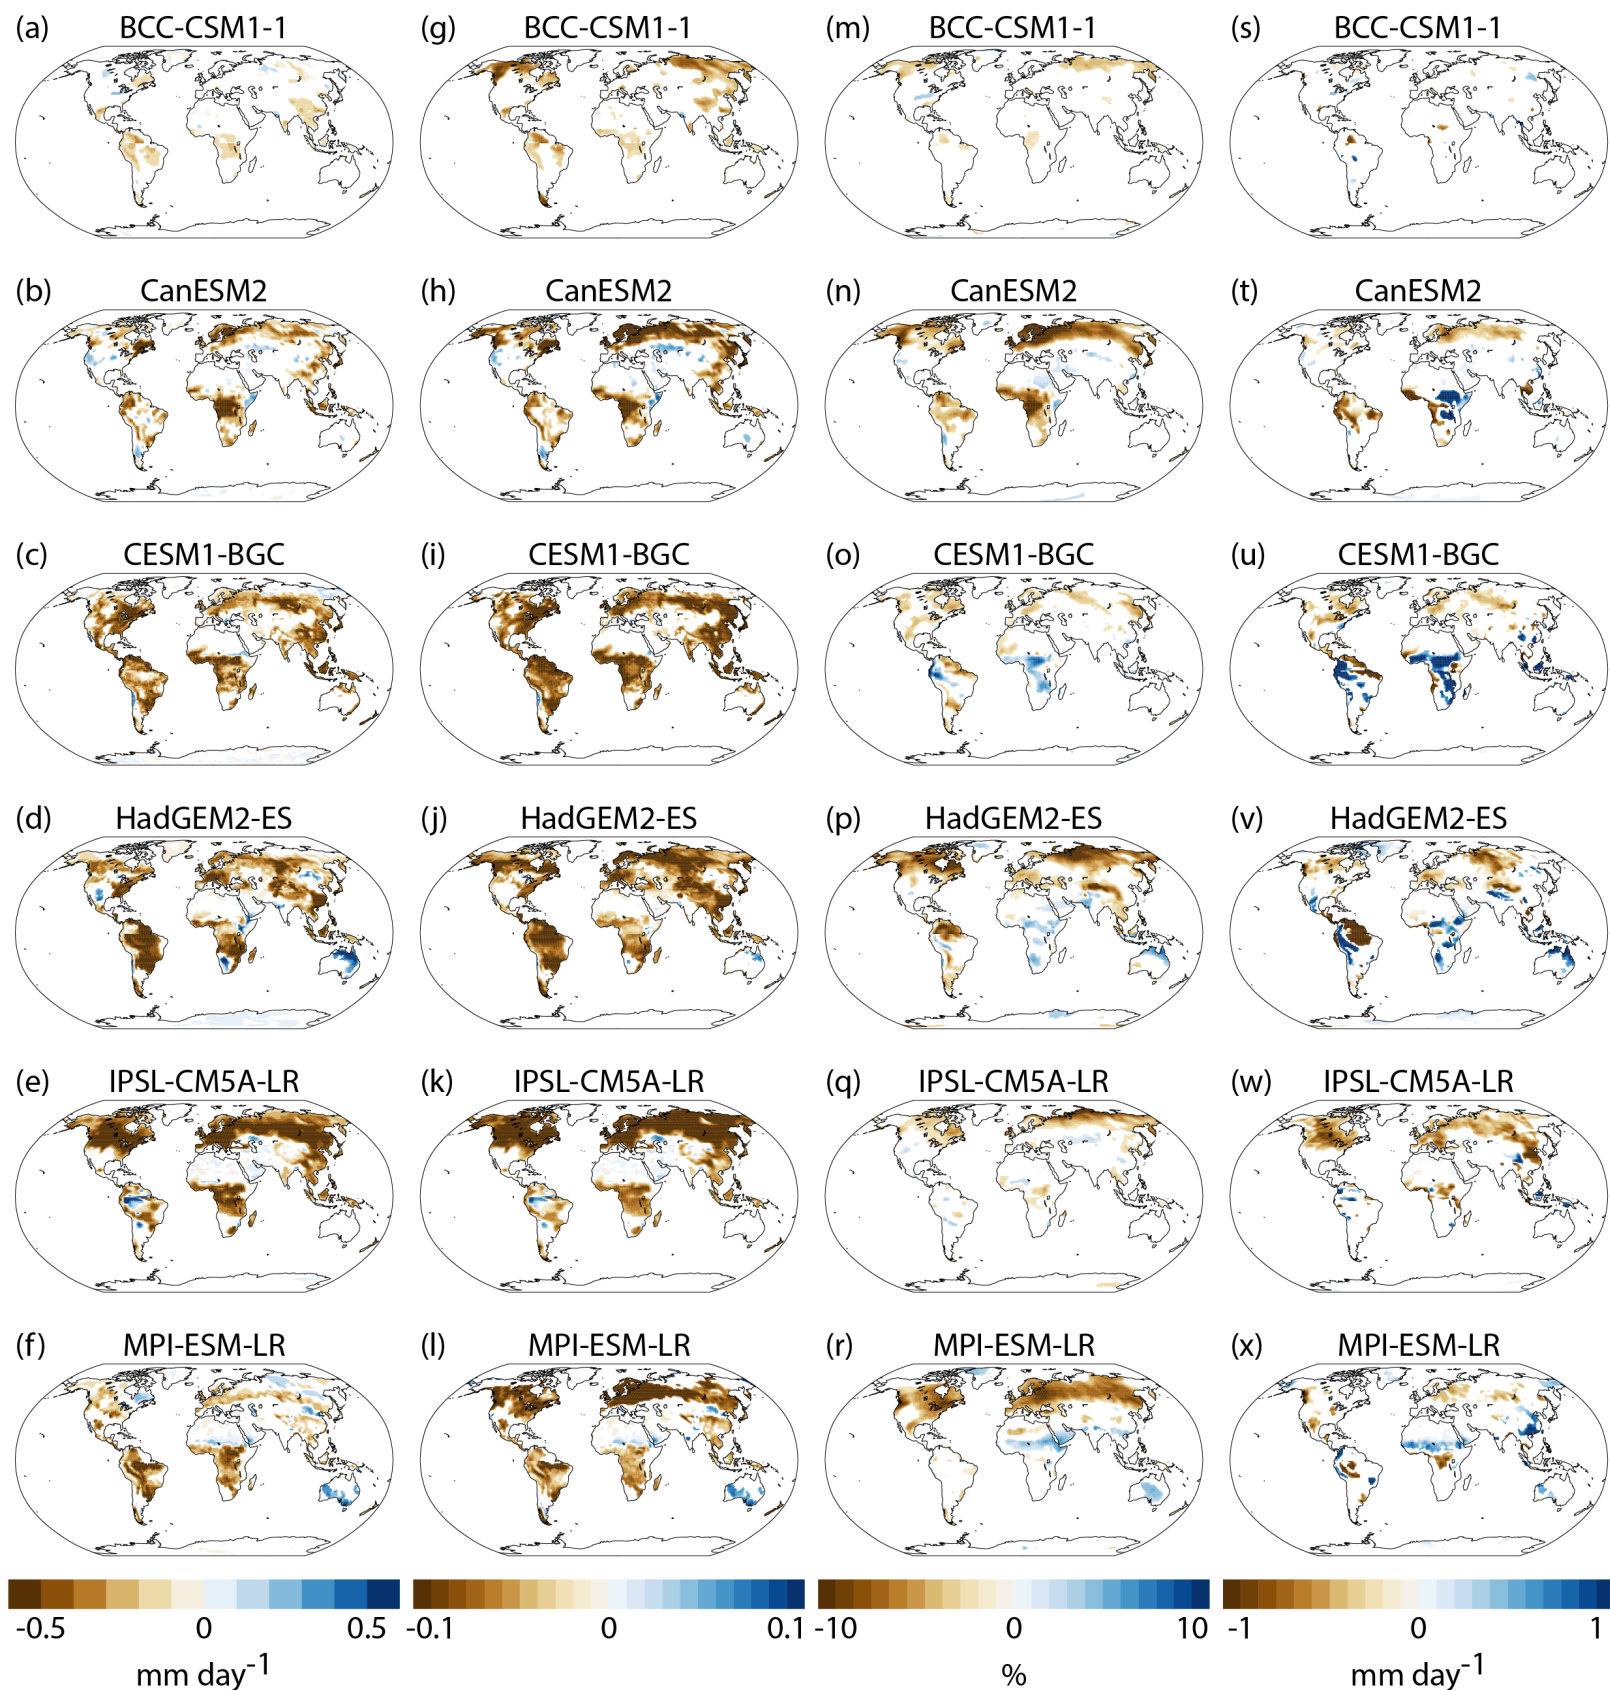

Supplementary Figure 4. Statistically significant changes in surface hydrological variables, clouds, and precipitation from CO<sub>2</sub> vegetation forcing over land. Change in mean summer (a-f) evapotranspiration, (g-l) evaporative fraction, (m-r) total cloud fraction, and (s-x) precipitation from CO<sub>2</sub> vegetation forcing. JJAS (DJFM) values are used in the Northern (Southern) Hemisphere.

Change in Summer  
Max Daily Temperature  
CO<sub>2</sub> Veg Forcing

Change in Summer  
Diurnal Temperature Range  
CO<sub>2</sub> Veg Forcing

Change in Summer  
Hottest Daily Max Temperature  
CO<sub>2</sub> Veg Forcing

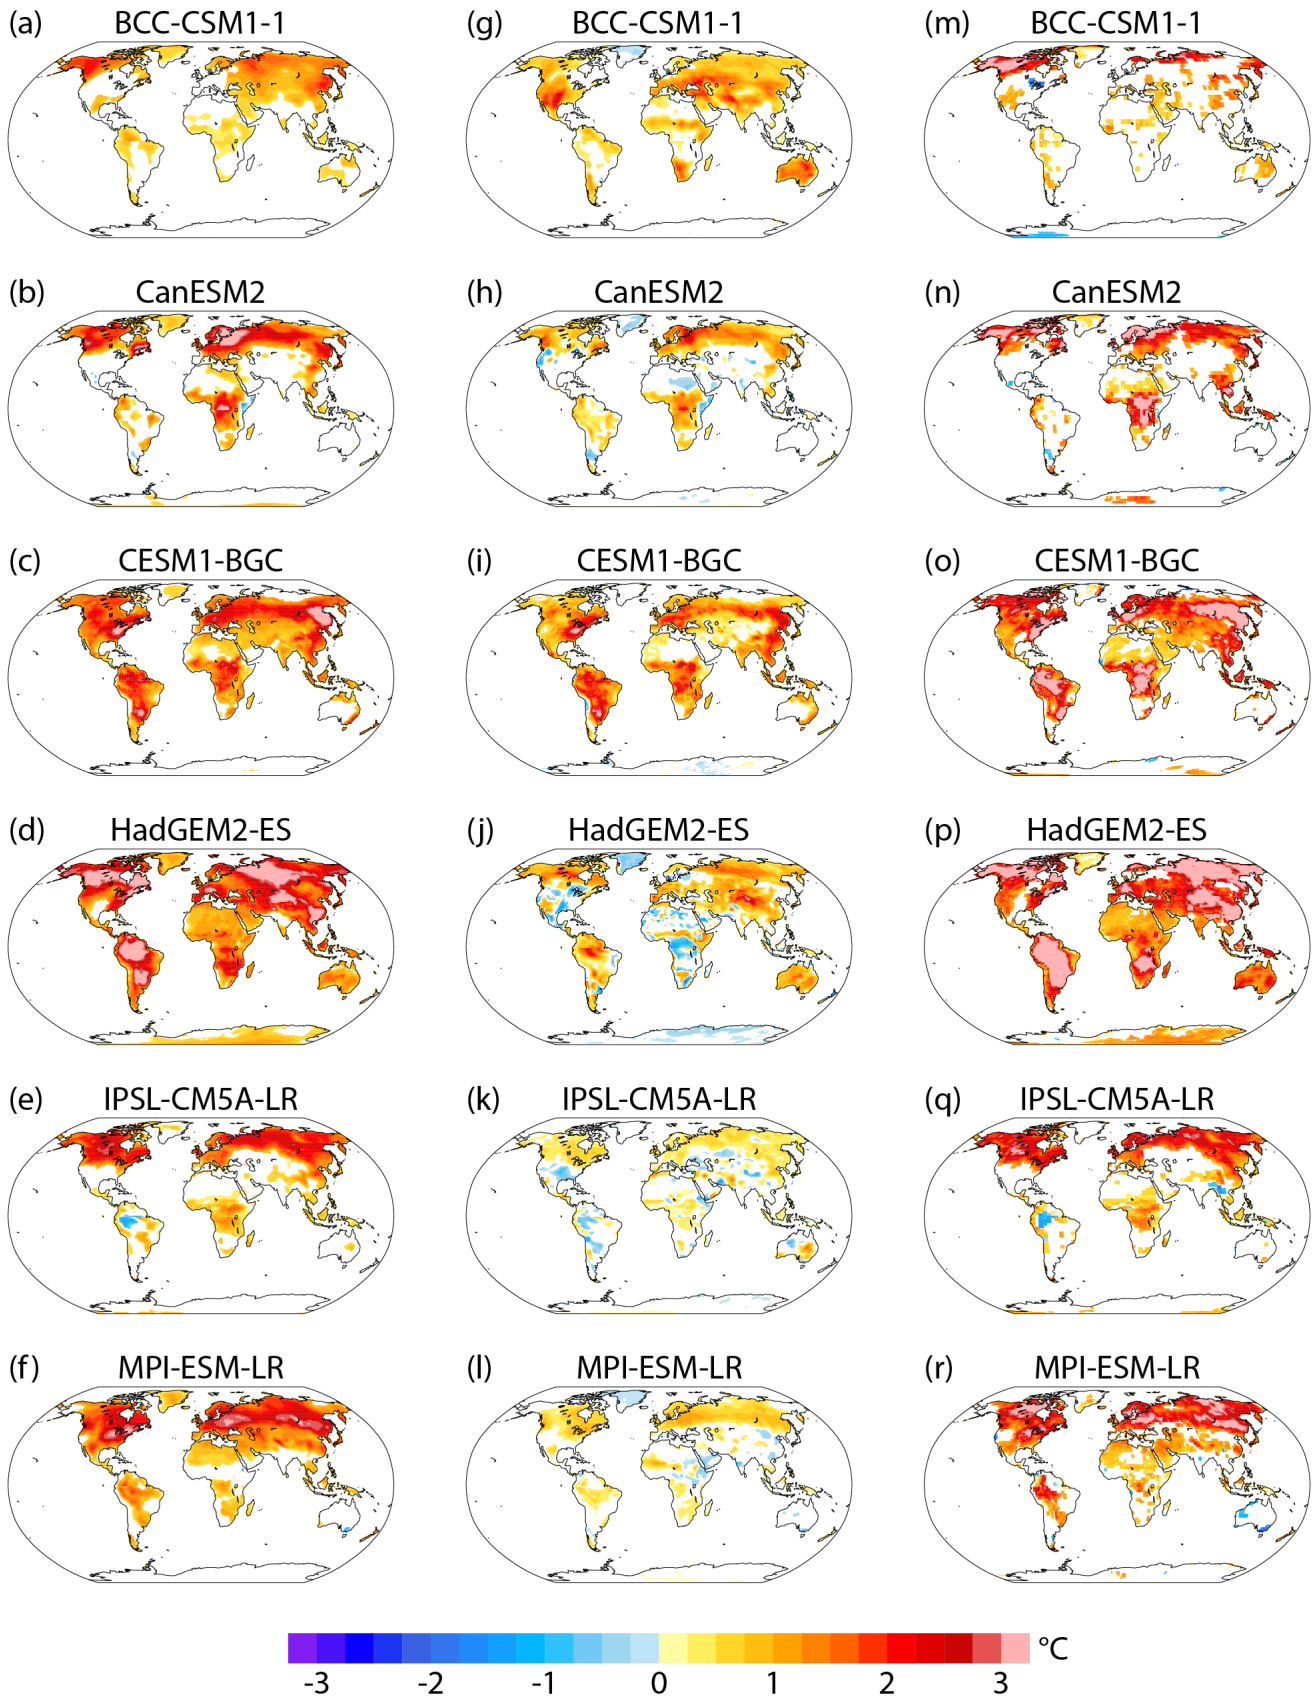

Supplementary Figure 5. Statistically significant changes in near-surface temperature from CO<sub>2</sub> vegetation forcing over land. Change in mean summer (a-f) maximum daily 2-meter temperature, (g-l) diurnal 2-meter temperature range, and (m-r) hottest daily maximum 2-meter temperature from CO<sub>2</sub> vegetation forcing. JJAS (DJFM) values are used in the Northern (Southern) Hemisphere.

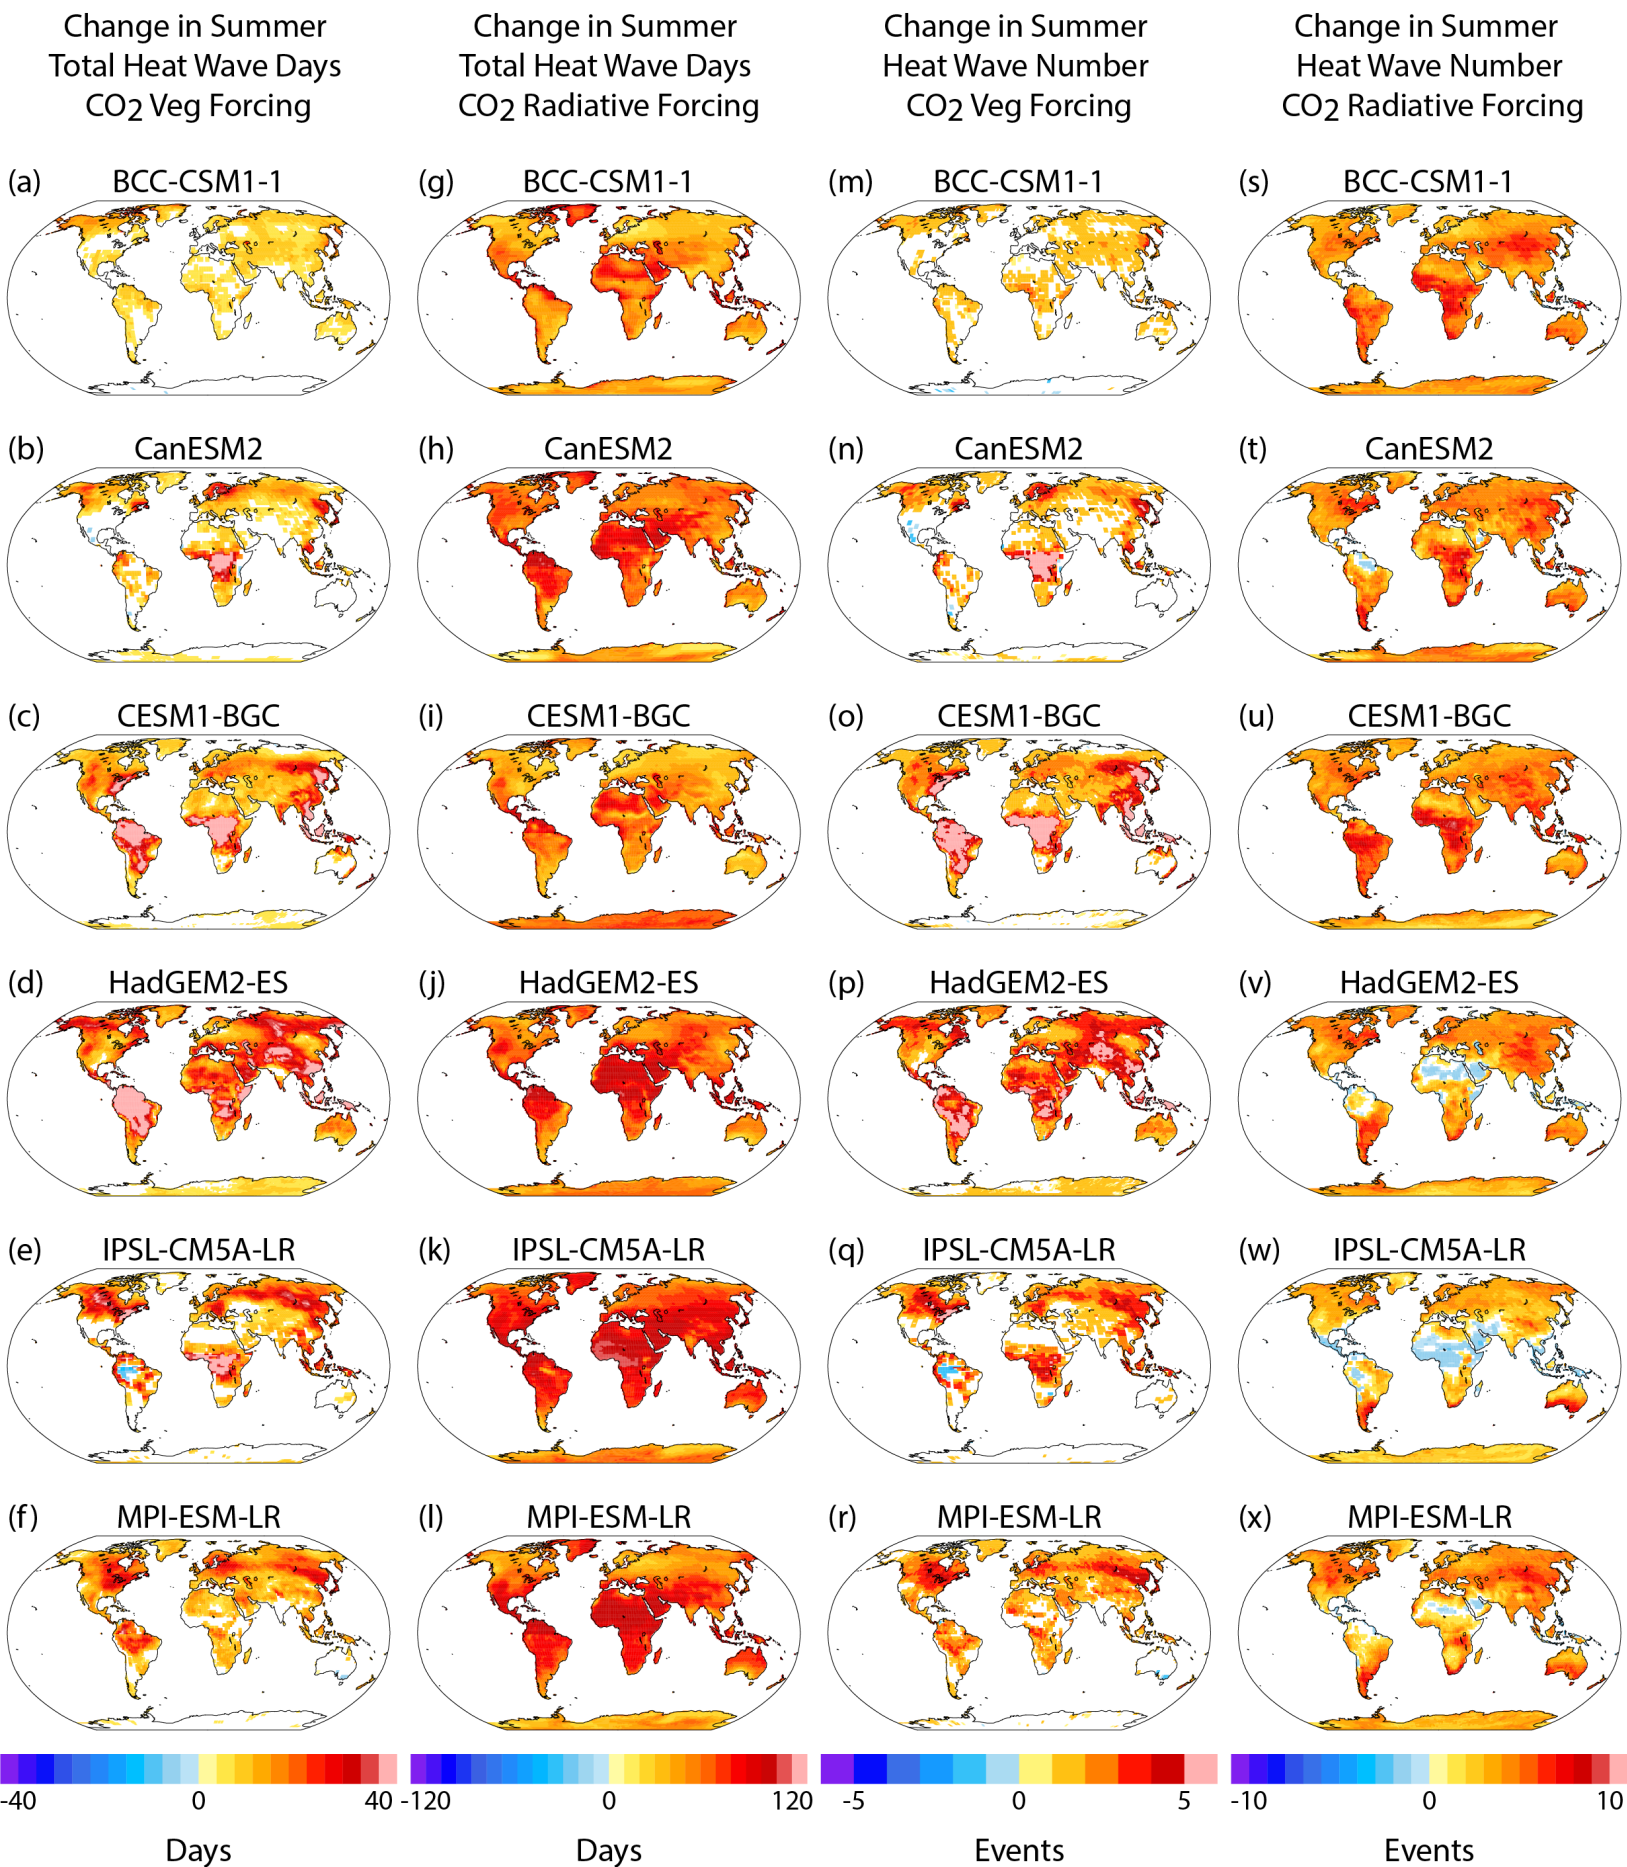

Supplementary Figure 6. Statistically significant changes in heat wave metrics from CO<sub>2</sub> forcing over land. Change in mean summer total heat wave days (HWT) from (a-f) CO<sub>2</sub> vegetation forcing, and (g-l) CO<sub>2</sub> radiative forcing. Change in mean summer heat wave number (HWN) from (m-r) CO<sub>2</sub> vegetation forcing, and (s-x) CO<sub>2</sub> radiative forcing. See Methods for heat wave metric definitions. JJAS (DJFM) values are used in the Northern (Southern) Hemisphere. Note the different scales for vegetation and radiative forcing.

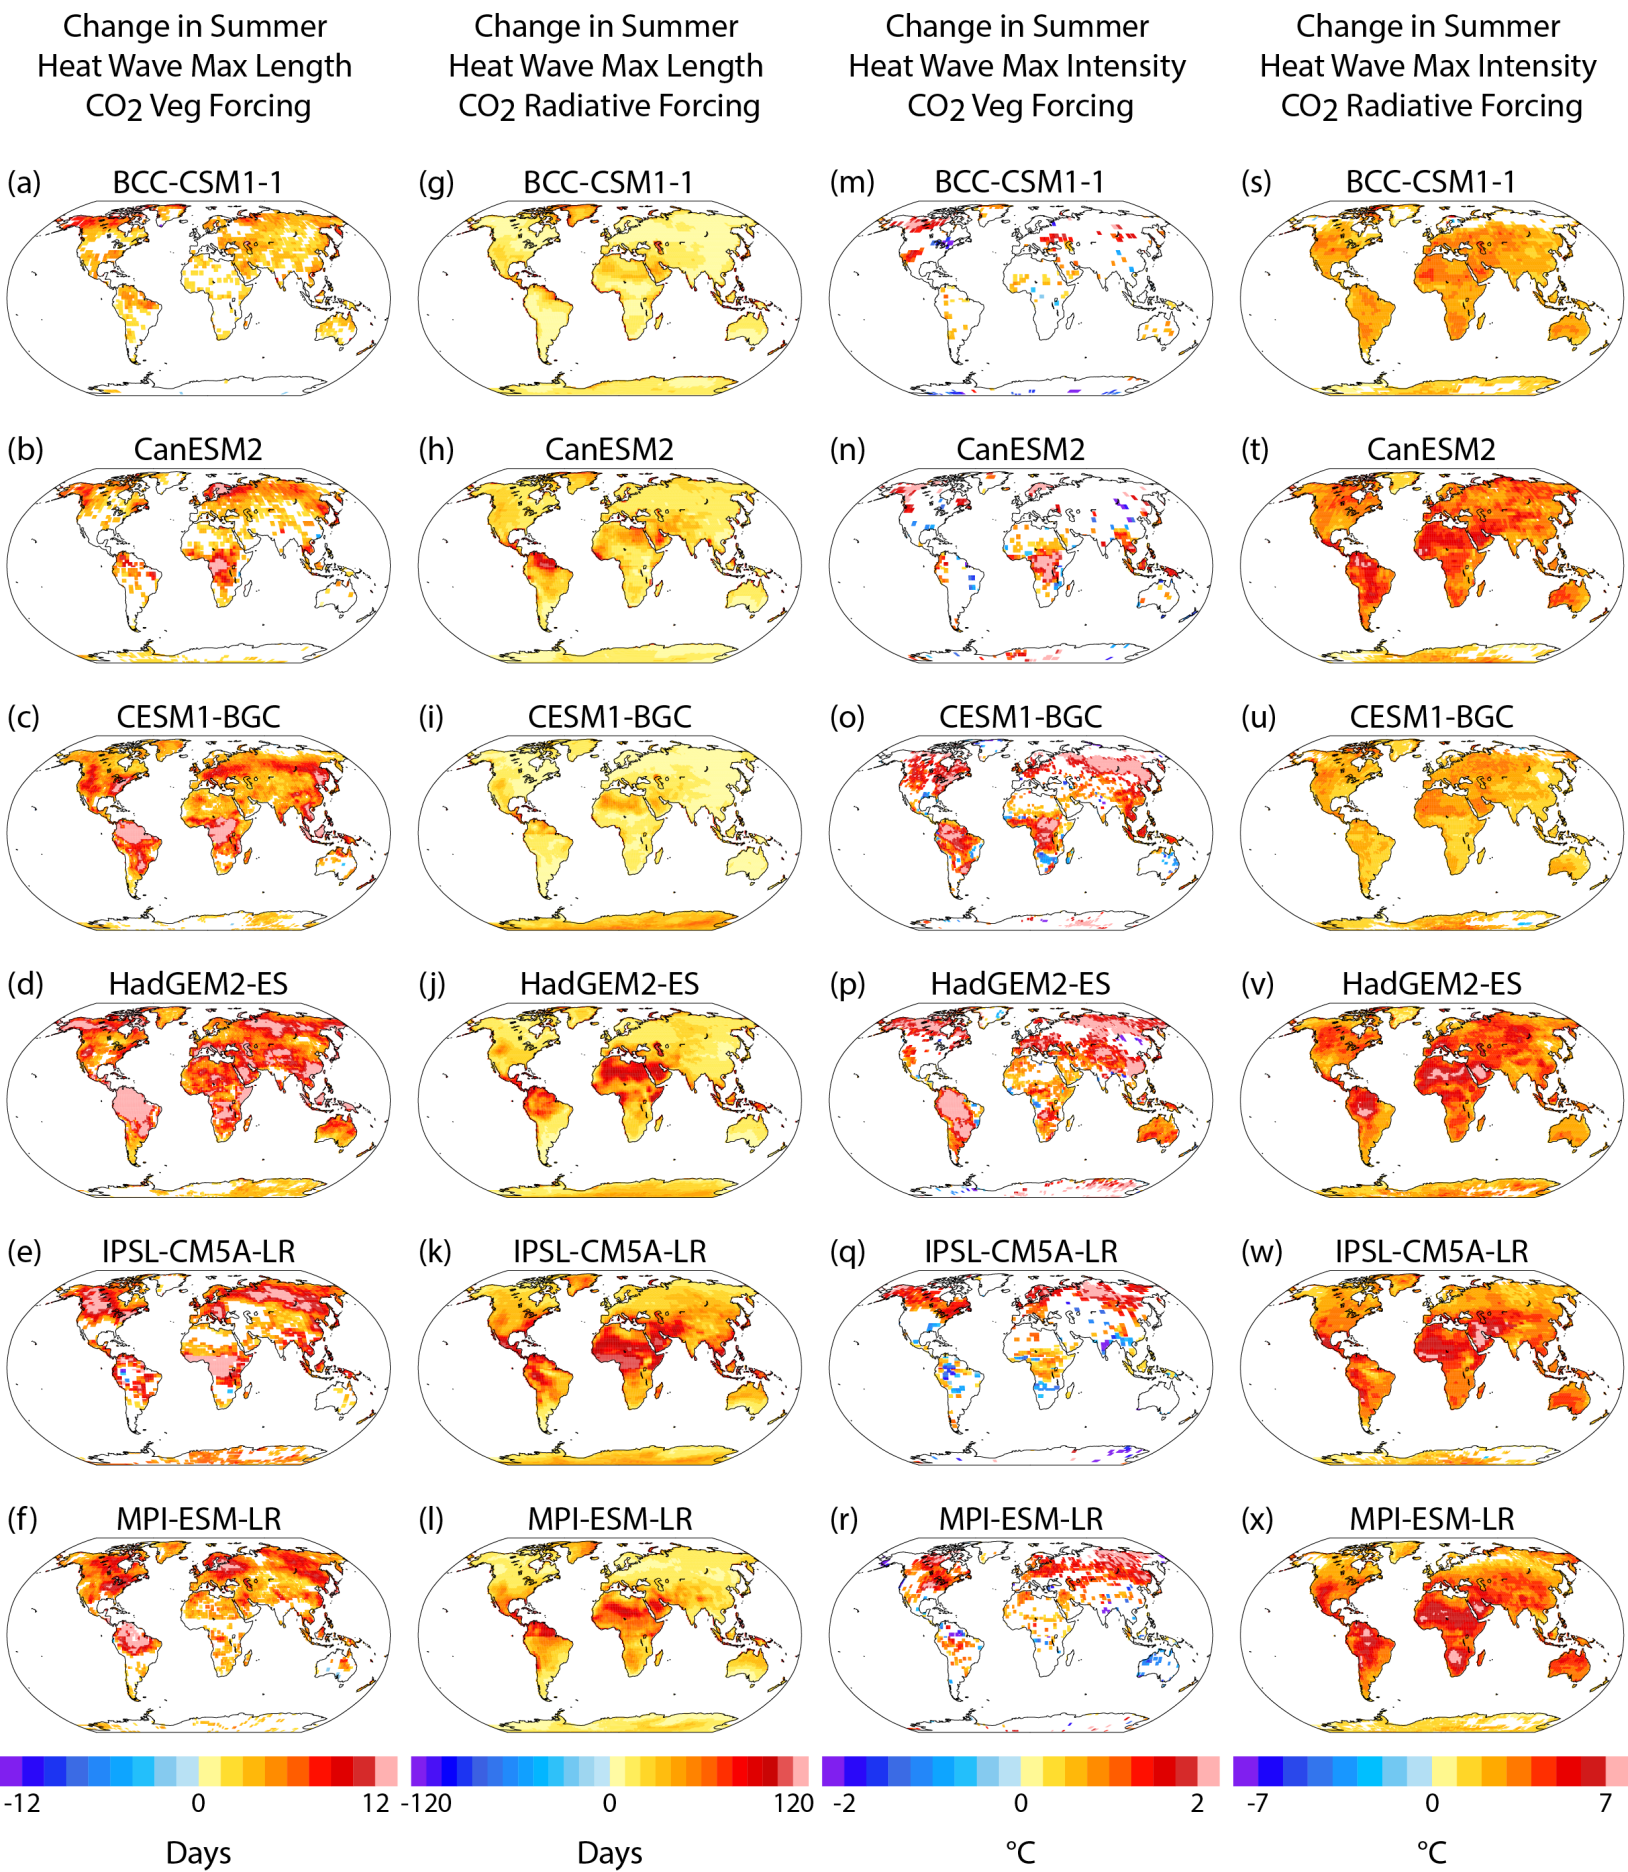

Supplementary Figure 7. Statistically significant changes in heat wave metrics from CO<sub>2</sub> forcing over land. Change in mean summer maximum heat wave length (HWML) from (a-f) CO<sub>2</sub> vegetation forcing, and (g-l) CO<sub>2</sub> radiative forcing. Change in mean summer heat wave maximum intensity (HWMI) from (m-r) CO<sub>2</sub> vegetation forcing, and (s-x) CO<sub>2</sub> radiative forcing. See Methods for heat wave metric definitions. JJAS (DJFM) values are used in the Northern (Southern) Hemisphere. Note the different scales for vegetation and radiative forcing.



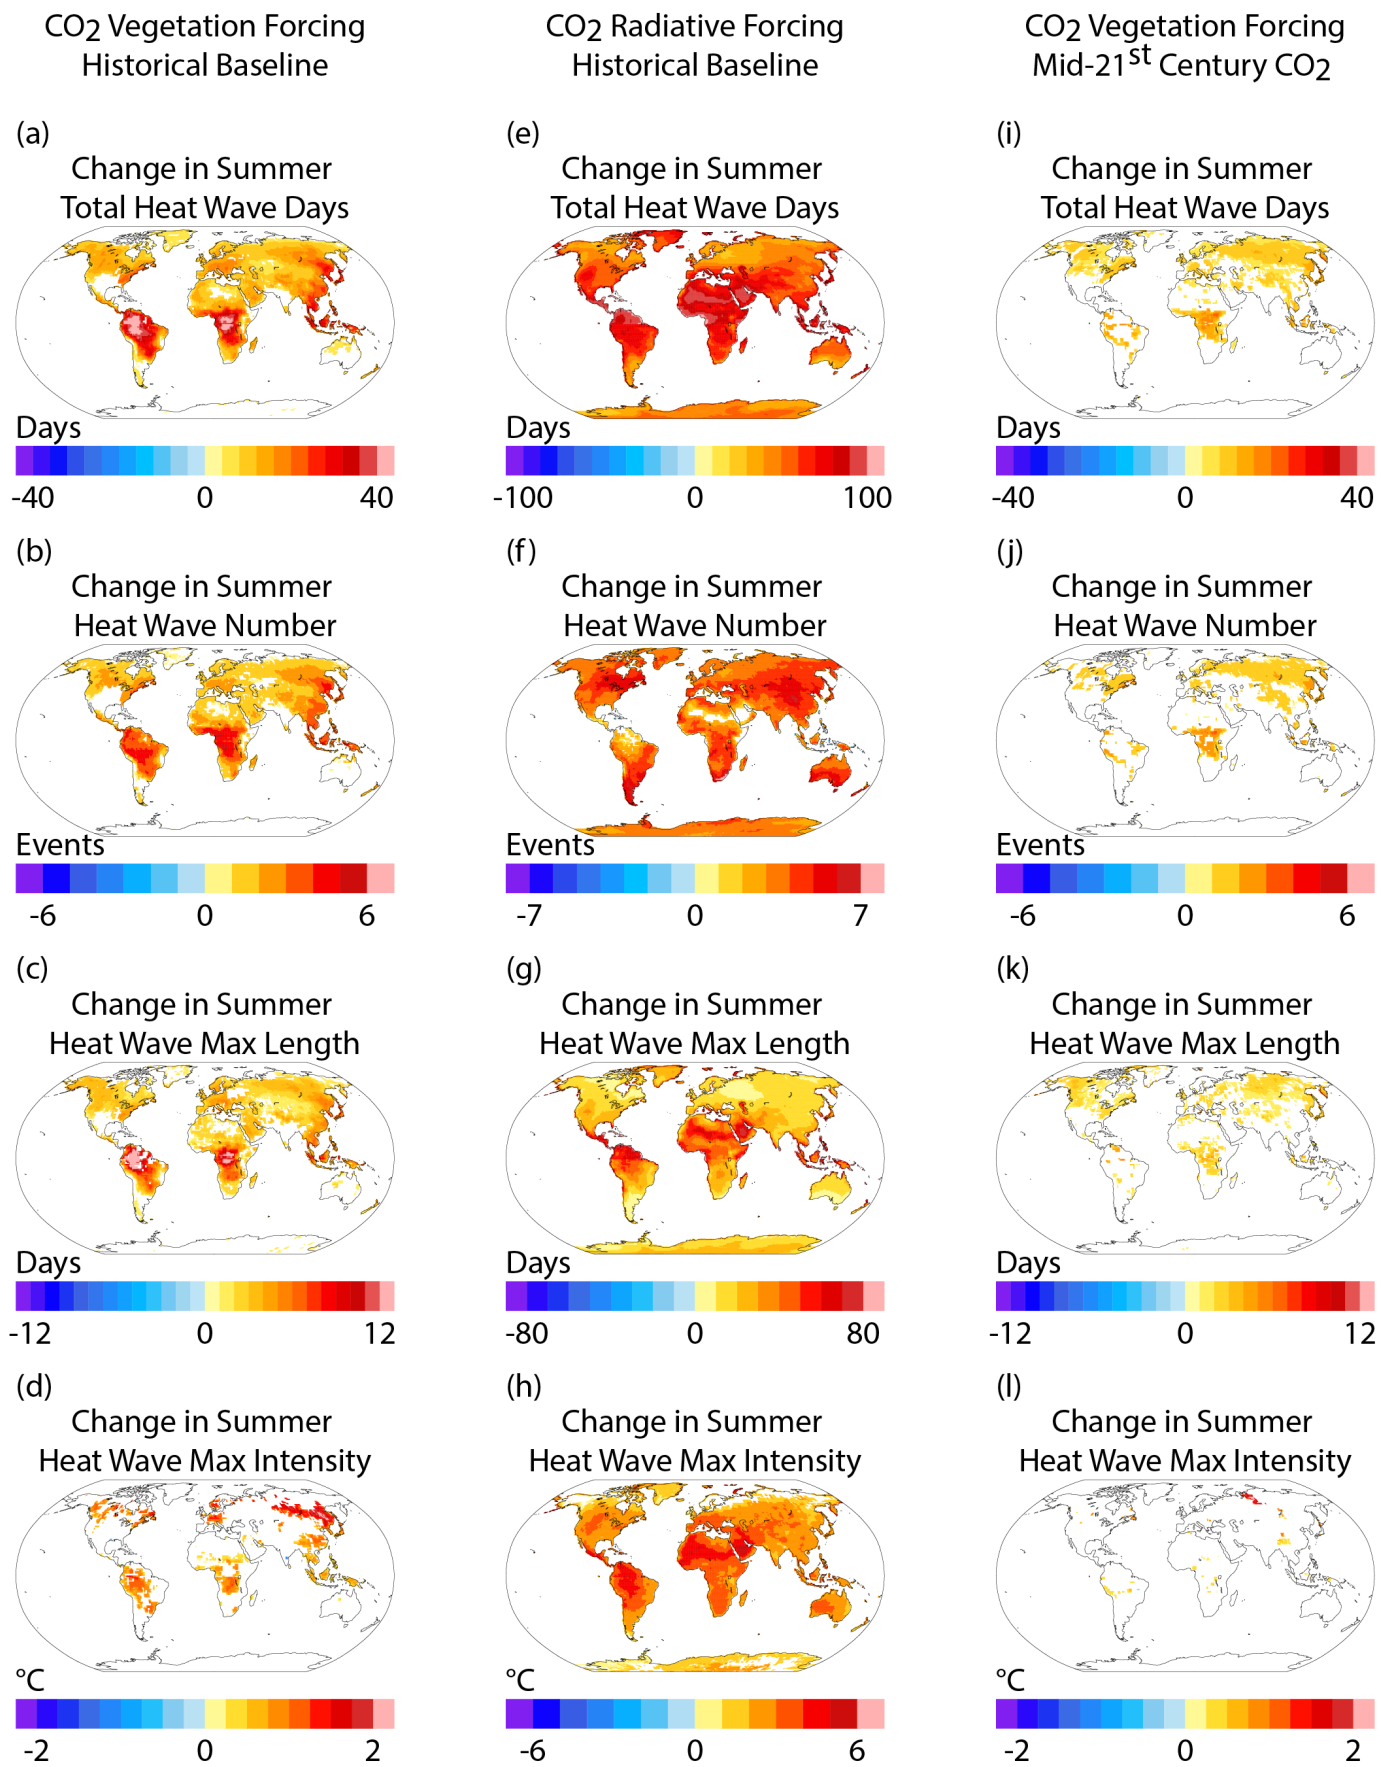

Supplementary Figure 8. Statistically significant changes in heat wave metrics from CO<sub>2</sub> forcing over land. Multi-model mean change in summer (a, e, i) total heat wave days (HWTD), (b, f, j) heat wave number (HWN), (c, g, k) heat wave maximum length (HWML), and (d, h, l) heat wave maximum intensity (HWMI). The changes are in response to (a-d) CO<sub>2</sub> vegetation forcing using a historical reference climate (final 30 years from VegCO<sub>2</sub> minus first 30 years from VegCO<sub>2</sub>), (e-h) CO<sub>2</sub> radiative forcing using a historical reference climate (final 30 years from RadCO<sub>2</sub> minus first 30 years from RadCO<sub>2</sub>), and (i-l) CO<sub>2</sub> vegetation forcing for a mid-21st century CO<sub>2</sub> concentration (years 58-87 from TotalCO<sub>2</sub> minus years 58-87 from RadCO<sub>2</sub>). See Methods for heat wave metric definitions. JJAS (DJFM) values are used in the Northern (Southern) Hemisphere. Note the different scales for vegetation and radiative forcing.

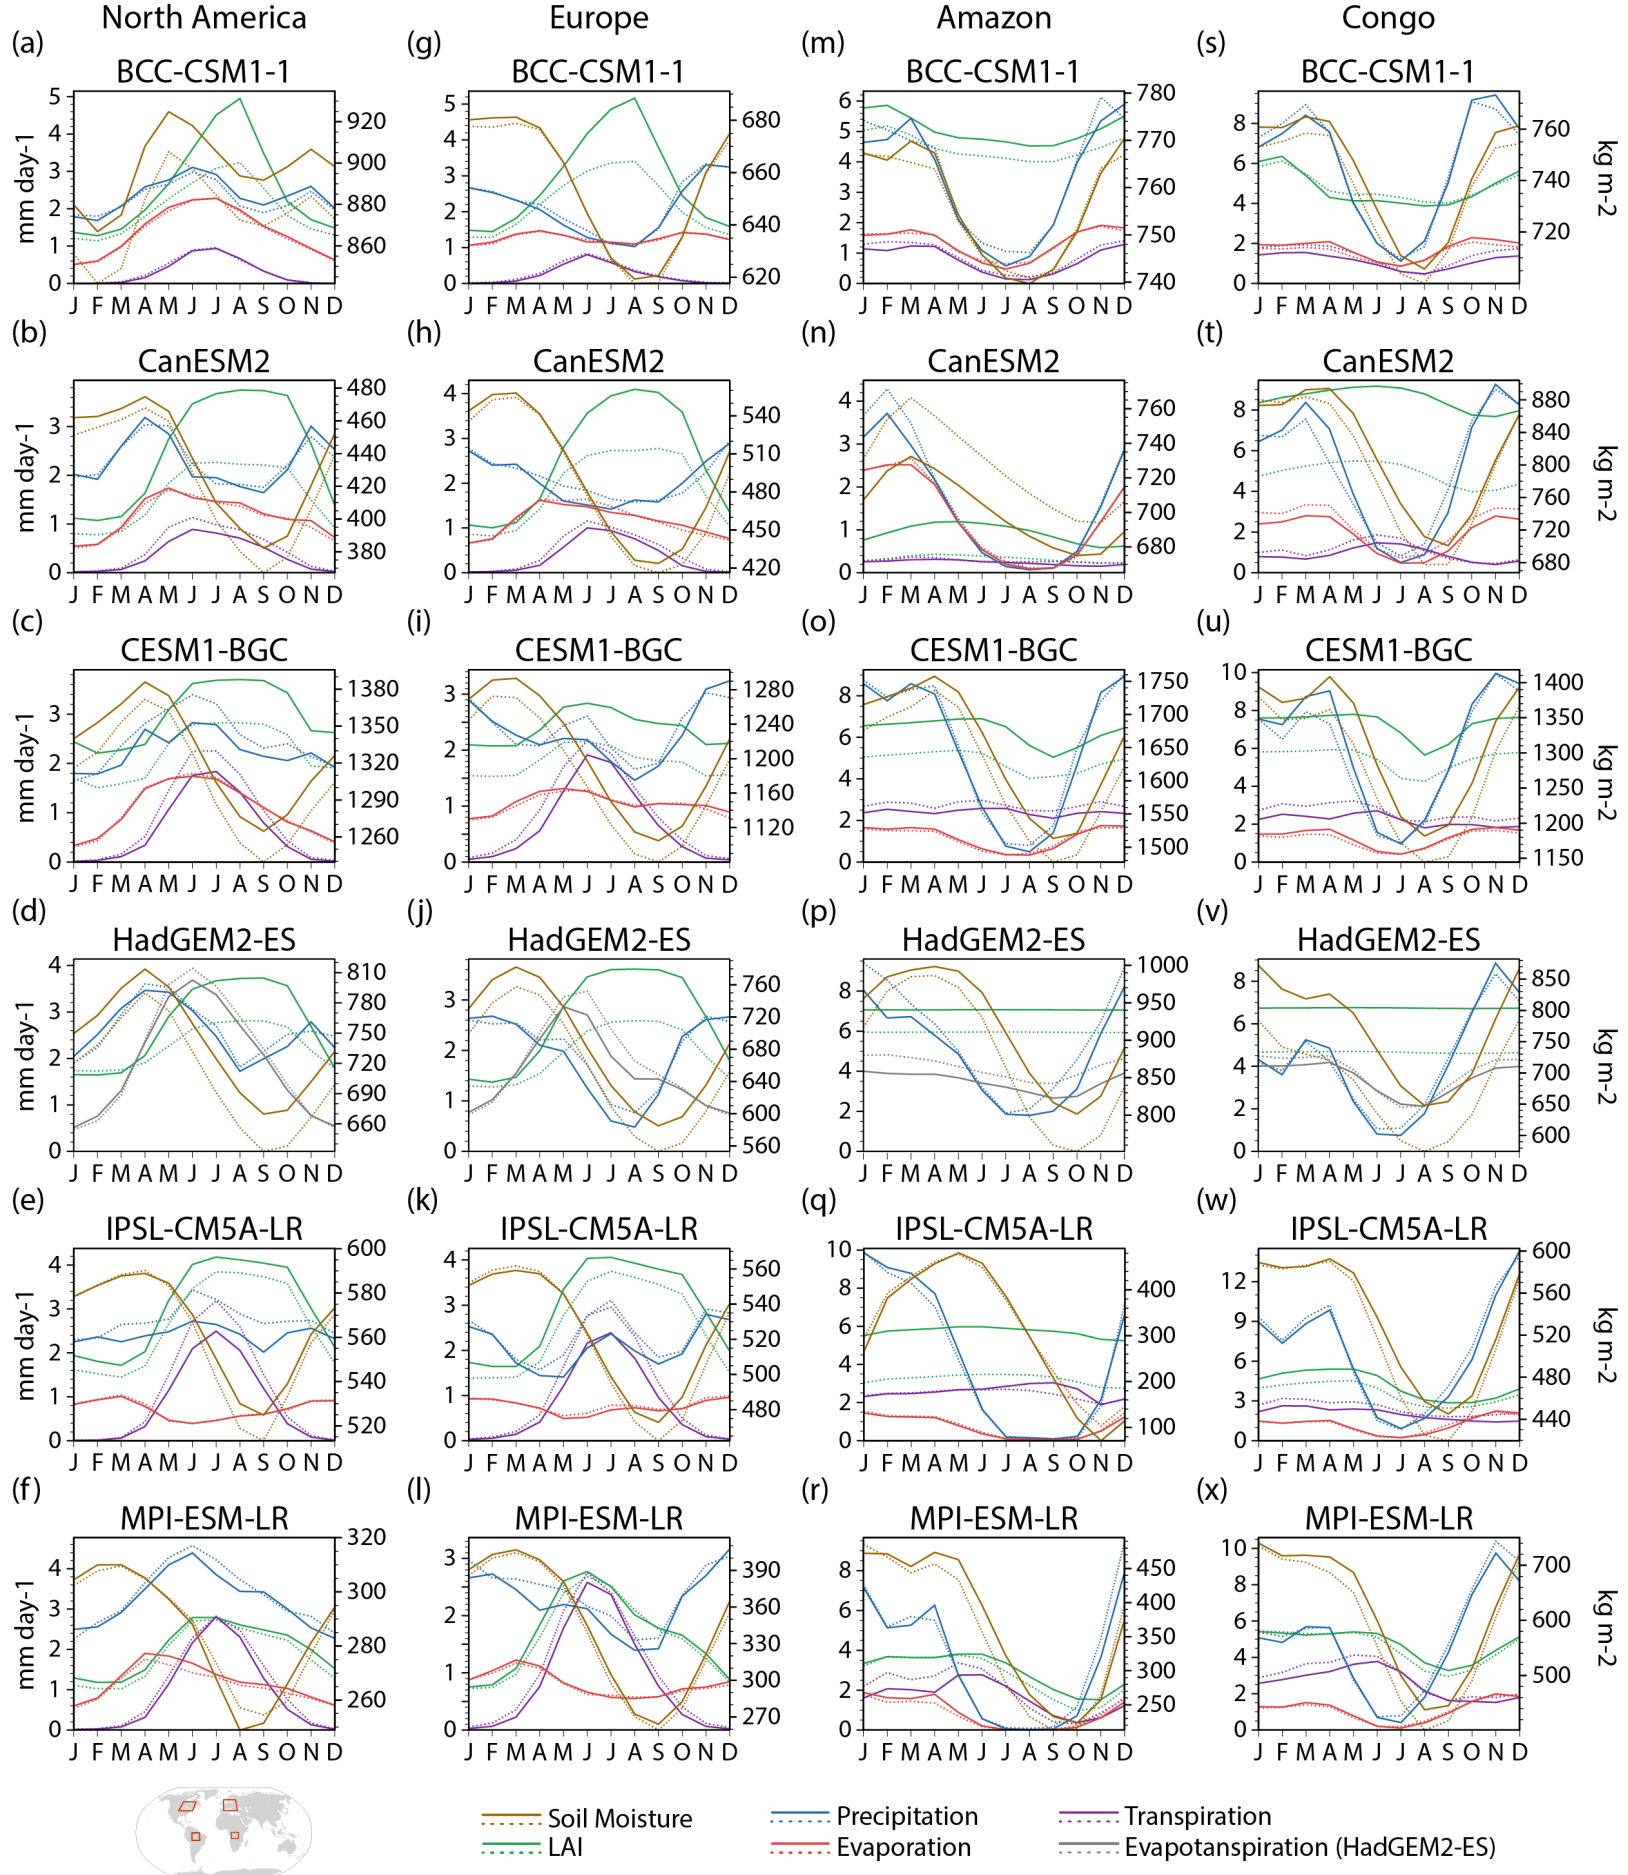

Supplementary Figure 9. Annual cycle of vegetation and hydrologic variables in simulations with and without future CO<sub>2</sub> vegetation forcing. CMIP5 multi-model mean area-weighted averages of total column soil moisture (brown), leaf area index (LAI) (green), precipitation (blue), evaporation (red), transpiration (purple), and evapotranspiration (grey) for portions of (a-f) North America (40°N-55°N, 100°W-70°W), (g-l) Europe (40°N-60°N, 0°-30°E), (m-r) the Amazon basin (0°-15°S, 65°W-50°W) and (s-x) the Congo basin (0°-10°S, 15°E-30°E). Dashed (solid) lines represent the final 30 years of *RadCO<sub>2</sub>* (*TotalCO<sub>2</sub>*). LAI (unitless), precipitation, evaporation, transpiration, and evapotranspiration correspond to the left y-axis. Soil moisture corresponds to the right y-axis. Evapotranspiration is shown for HadGEM2-ES.

## Supplementary Tables

Supplementary Table 1. CMIP5 model resolution and land surface components

| Model Name   | Atmosphere Model Resolution | Dynamic Vegetation | Stomatal Conductance Scheme | Soil Depth, Number of Layers |
|--------------|-----------------------------|--------------------|-----------------------------|------------------------------|
| BCC-CSM1-1   | T42L26 ~ 2.8°               | No                 | Ball-Berry                  | 3.43m, 10 layers             |
| CanESM2      | T63L35 ~ 2.8°               | No                 | Leuning                     | 4.10m, 3 layers              |
| CESM1-BGC    | 0.9° x 1.25°                | No                 | Ball-Berry                  | 3.80m, 10 layers             |
| HadGEM2-ES   | 1.25° x 1.875°              | Yes                | Simplified Leuning          | 3.00m, 4 layers              |
| IPSL-CM5A-LR | 1.9° x 3.75°                | No                 | Ball-Berry                  | Varies, 2 layers             |
| MPI-ESM-LR   | T63L47 ~ 1.875°             | Yes                | Knorr                       | Varies, 1 layer              |

Only hydrologically-active soil depths and layers are listed. IPSL-CM5A-LR and MPI-ESM-LR utilize bucket models with geographically varying soil depths depending on root distribution.

Supplementary Table 2. Average rate of LAI change and transpiration change during the first and second doubling of CO<sub>2</sub>

| Model Name                          | $\Delta$ LAI<br>284–568 ppm<br>(m <sup>2</sup> m <sup>-2</sup> ppm <sup>-1</sup> ) | $\Delta$ LAI<br>568–1132 ppm<br>(m <sup>2</sup> m <sup>-2</sup> ppm <sup>-1</sup> ) | $\Delta$ Transp<br>284–568 ppm<br>(mm ppm <sup>-1</sup> ) | $\Delta$ Transp<br>568–1132 ppm<br>(mm ppm <sup>-1</sup> ) |
|-------------------------------------|------------------------------------------------------------------------------------|-------------------------------------------------------------------------------------|-----------------------------------------------------------|------------------------------------------------------------|
| <b>Tropics (15°S–15°N)</b>          |                                                                                    |                                                                                     |                                                           |                                                            |
| BCC-CSM1-1                          | 1.49 <sup>-3</sup>                                                                 | 0.789 <sup>-3</sup>                                                                 | -3.81 <sup>-4</sup>                                       | -1.62 <sup>-4</sup>                                        |
| CanESM2                             | 3.29 <sup>-3</sup>                                                                 | 1.50 <sup>-3</sup>                                                                  | -1.72 <sup>-4</sup>                                       | -1.53 <sup>-4</sup>                                        |
| CESM1-BGC                           | 2.24 <sup>-3</sup>                                                                 | 1.94 <sup>-3</sup>                                                                  | -7.65 <sup>-4</sup>                                       | -5.66 <sup>-4</sup>                                        |
| HadGEM2-ES                          | 2.48 <sup>-3</sup>                                                                 | 1.45 <sup>-3</sup>                                                                  | -2.97 <sup>-4</sup>                                       | -6.00 <sup>-4</sup>                                        |
| IPSL-CM5A-LR                        | 1.71 <sup>-3</sup>                                                                 | 0.864 <sup>-3</sup>                                                                 | -3.38 <sup>-4</sup>                                       | -2.76 <sup>-4</sup>                                        |
| MPI-ESM-LR                          | 0.424 <sup>-3</sup>                                                                | 0.119 <sup>-3</sup>                                                                 | -4.34 <sup>-4</sup>                                       | -3.69 <sup>-4</sup>                                        |
| <b>Subtropics (15°S/N–30°S/N)</b>   |                                                                                    |                                                                                     |                                                           |                                                            |
| BCC-CSM1-1                          | 2.76 <sup>-3</sup>                                                                 | 0.746 <sup>-3</sup>                                                                 | +0.486 <sup>-4</sup>                                      | -0.824 <sup>-4</sup>                                       |
| CanESM2                             | 1.29 <sup>-3</sup>                                                                 | 0.752 <sup>-3</sup>                                                                 | -0.154 <sup>-4</sup>                                      | -0.542 <sup>-4</sup>                                       |
| CESM1-BGC                           | 1.31 <sup>-3</sup>                                                                 | 1.13 <sup>-3</sup>                                                                  | -3.72 <sup>-4</sup>                                       | -1.83 <sup>-4</sup>                                        |
| HadGEM2-ES                          | 1.88 <sup>-3</sup>                                                                 | 0.848 <sup>-3</sup>                                                                 | +2.91 <sup>-4</sup>                                       | -1.44 <sup>-4</sup>                                        |
| IPSL-CM5A-LR                        | 0.507 <sup>-3</sup>                                                                | 0.291 <sup>-3</sup>                                                                 | -2.36 <sup>-4</sup>                                       | -0.426 <sup>-4</sup>                                       |
| MPI-ESM-LR                          | 0.542 <sup>-3</sup>                                                                | 0.236 <sup>-3</sup>                                                                 | -3.34 <sup>-4</sup>                                       | -3.20 <sup>-4</sup>                                        |
| <b>Extratropics (30°S/N–70°S/N)</b> |                                                                                    |                                                                                     |                                                           |                                                            |
| BCC-CSM1-1                          | 2.25 <sup>-3</sup>                                                                 | 0.805 <sup>-3</sup>                                                                 | +0.312 <sup>-4</sup>                                      | -0.604 <sup>-4</sup>                                       |
| CanESM2                             | 1.06 <sup>-3</sup>                                                                 | 0.822 <sup>-3</sup>                                                                 | -0.622 <sup>-4</sup>                                      | -0.578 <sup>-4</sup>                                       |
| CESM1-BGC                           | 0.803 <sup>-3</sup>                                                                | 0.630 <sup>-3</sup>                                                                 | -2.67 <sup>-4</sup>                                       | -2.21 <sup>-4</sup>                                        |
| HadGEM2-ES                          | 1.79 <sup>-3</sup>                                                                 | 0.686 <sup>-3</sup>                                                                 | -0.451 <sup>-4</sup>                                      | -1.72 <sup>-4</sup>                                        |
| IPSL-CM5A-LR                        | 0.534 <sup>-3</sup>                                                                | 0.152 <sup>-3</sup>                                                                 | -3.02 <sup>-4</sup>                                       | -2.50 <sup>-4</sup>                                        |
| MPI-ESM-LR                          | 0.774 <sup>-3</sup>                                                                | 0.293 <sup>-3</sup>                                                                 | +0.514 <sup>-4</sup>                                      | -0.744 <sup>-4</sup>                                       |

Rates of change expressed as: ( $\Delta$ LAI/ $\Delta$ CO<sub>2</sub> ppm) and ( $\Delta$ Tran/ $\Delta$ CO<sub>2</sub> ppm).

## Supplementary Note 1

Earth system models (ESMs) exhibit varying skill in simulating global spatial patterns of summer LAI (Supplementary Figure 1) (1). In the mid-latitudes, most models correctly simulate greatest LAI in the deciduous broadleaf forests of the eastern United States and Europe, and in the needleleaf forests of Canada, northern Europe and Asia (mid-latitude centered spatial correlations with AVH15C1 range from 0.31 to 0.75). MPI-ESM-LR (correlation of 0.31) largely misses this pattern. Similarly, most models correctly simulate high LAI in the tropical evergreen broadleaf forests of the Amazon, Congo, and Maritime Continent (tropical, centered pattern correlations with AVH15C1 range from 0.36 to 0.71), though a dry bias in CanESM2 (2) contributes to substantial underestimation of Amazon LAI (correlation of 0.36). Some of the regional-scale LAI differences between AVH15C1 and the models may be driven by a lack of prescribed land use change in several of the ESMs. A detailed evaluation of simulated LAI in the CMIP5 ensemble can be found in (1).

## Supplementary References

- 1 Mahowald, N. *et al.* Projections of leaf area index in earth system models. *Earth Syst. Dynam.* **7**, 211-229 (2016).
- 2 Ahlström, A. *et al.* Hydrologic resilience and Amazon productivity. *Nature Communications* **8**, 387, doi:10.1038/s41467-017-00306-z (2017).
